# Supplementary material
Source: publisher site journal article supplement (https://www.degruyter.com/publication/journal_key/JBCPP/downloadAsset/JBCPP_Manuscript%20Checklist.pdf)
Supplement: Supplementary file 1 [file JBCPP_Manuscript%20Checklist.pdf]

**Manuscript checklist: General format and length of article types accepted for submission to the *Journal of Basic and Clinical Physiology and Pharmacology***

|                      | Word limit | Word limit in abstract         | Number of keywords | Number of tables & figures | Number of references | Article structure                                                                    |
|----------------------|------------|--------------------------------|--------------------|----------------------------|----------------------|--------------------------------------------------------------------------------------|
| Original Article     | 3500       | 200, structured*               | 3-6                | 8                          | 50                   | Structured into Introduction, Materials (Subjects) and methods, Results, Discussion  |
| Review               | 6000       | 200, structured**/unstructured | 3-6                | 8                          | 150                  | Structured                                                                           |
| Minireview           | 3500       | 200, structured**/unstructured | 3-6                | 4                          | 40                   | Structured                                                                           |
| Short Communication  | 1500       | 200, structured*               | 3-6                | 4                          | 30                   | Unstructured; Materials & methods are described in the legends to Figures and Tables |
| Letter to the Editor | 1200       | n/a                            | 3-6                | 2                          | 10                   | Unstructured                                                                         |
| Editorial            | 1500       | n/a                            | n/a                | 1                          | 10                   | n/a                                                                                  |

\*Headings: Objectives; Methods; Results; Conclusions.

\*\*Headings if structured: Objectives; Content; Summary and Outlook.

**Note:** for the indicated word count, the title page, abstract, tables, figures, references list, abbreviation list, appendices & supplementary material are excluded.

**When you submit your work, please ensure the following:**

- You have read the Instructions for Authors ([available from JBCPP homepage](#)).
- The manuscript is complete and uploaded correctly. The HTML version and/or the PDF file generated from the submitted files must be complete and approved.
- The language in which the manuscript was written is correct and has been checked by a native speaker or a professional language service, if applicable.
- The title page information includes the full title, short title, the full names of all authors (given name, middle initials, family name), the full address of all affiliations as well as the e-mail address of the corresponding author. The title page may also indicate the word count, the number of tables and figures, and whether the submission includes any supplementary material.
- All figures and tables have been uploaded and appear in correct order at the end of the system-generated PDF manuscript proof.
- Abstract, keywords, list of abbreviations, tables and figures, and captions and legends are included, depending on the manuscript type.
- Manuscript is spell-checked and within the word limit for the type of article.
- References are in the correct format according to the journal's referencing style [[see Referencing Guide](#)].
- Literature references mentioned in the reference list are cited in the text and *vice versa*.
- Online manuscript submission URL: <https://mc.manuscriptcentral.com/jbcpp>
